# Supplementary material for: Long-term outcome of subthalamic nucleus deep brain stimulation for Parkinson's disease using an MRI-guided and MRI-verified approach
Source: PubMed Central journal article supplement — J Neurol Neurosurg Psychiatry. 2014 Apr 30;85(12):1419–25. doi: 10.1136/jnnp-2013-306907 (PMC4451170; doi:10.1136/jnnp-2013-306907), 2014-04-30

Supplementary Figures

Improvement in UPDRS III during the off medication condition following STN DBS at different follow-up points. (Data correspond to the cohort of patients followed beyond 8 years; \* indicates a significant change  $p < 0.05$  in comparison to the baseline score)

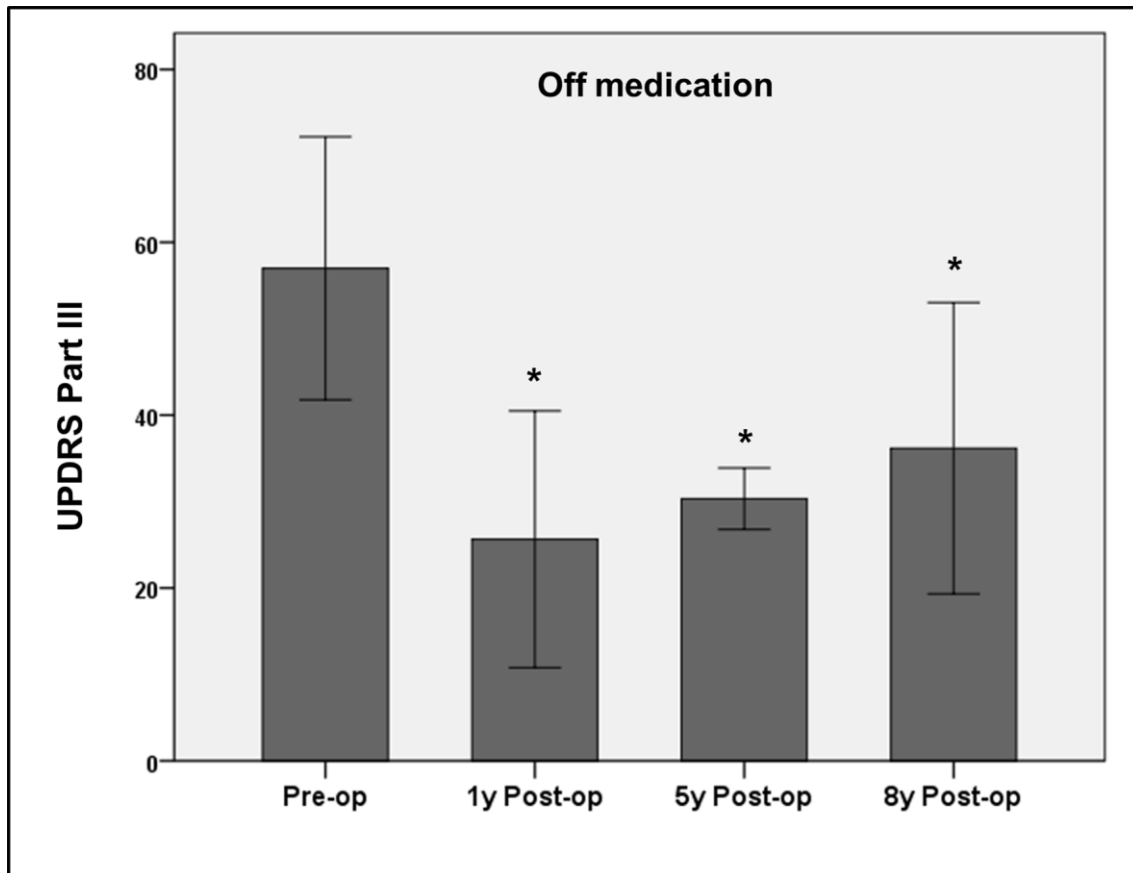

Supplement: jnnp-2013-306907-s1.pdf [file jnnp-2013-306907-s1.pdf]
